# Supplementary material for: Do We Need New Personalized Emergency Telehealth Solutions? A Survey of 100 Emergency Department Patients and a First Report of the Swiss Limmex Emergency Wristwatch: An Original Study
Source: Hindawi journal article supplement (doi:10.1155/2012/736264), 2012-01-01
Supplement: f1 [file 736264.f1.pdf]

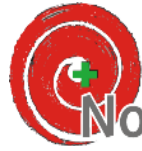

Notfallzentrum

## Anonymous Patient Questionnaire

Theme: Access to Emergency Numbers

Gender: ☐ male ☐ female

Nationality: ☐ CH ☐ Other

Age: \_\_\_\_\_

Your highest completed level of education:

|                                                                                                                                                                      |
|----------------------------------------------------------------------------------------------------------------------------------------------------------------------|
| <input type="checkbox"/> None                                                                                                                                        |
| <input type="checkbox"/> Compulsory school (primary, technical college, secondary school, district school, orientation school, grammar school, special needs school) |
| <input type="checkbox"/> Completed professional training                                                                                                             |
| <input type="checkbox"/> Matura [equivalent to A-Levels]                                                                                                             |
| <input type="checkbox"/> Higher Professional Training                                                                                                                |
| <input type="checkbox"/> University                                                                                                                                  |

Reason for admission: ☐ Disease ☐ Accident

1. Which emergency numbers do you know?

- ☐ GP
- ☐ Ambulance
- ☐ Air rescue
- ☐ Emergency centre/ Hospital
- ☐ Other emergency number
