# Supplementary material for: Do We Need New Personalized Emergency Telehealth Solutions? A Survey of 100 Emergency Department Patients and a First Report of the Swiss Limmex Emergency Wristwatch: An Original Study
Source: Hindawi journal article supplement (doi:10.1155/2012/736264), 2012-01-01
Supplement: f2 [file 736264.f2.pdf]

## Appendix A

2. How do you contact the emergency centre in the event of an emergency?
  - ☐ I phone them up myself.
  - ☐ My partner, friend or relative phones them.
  - ☐ My GP makes an appointment.
  - ☐ Nursing service or other nurses phone them.
  - ☐ I just turned up. / I was brought there.
  - ☐ Other, namely \_\_\_\_\_
3. Do you use a mobile phone?
  - ☐ Yes
  - ☐ No
4. How many people do you live with?
  - ☐ I live alone.
  - ☐ Together with my partner or spouse/friends/brothers or sisters/parents
5. Where do you live?
  - ☐ At home
  - ☐ Protected accommodation
  - ☐ Nursing home
  - ☐ Other, namely \_\_\_\_\_
6. If something happens to you at home and you cannot speak or telephone yourself:  
How long do you think you would usually have to wait before anyone notices that something has happened to you?
  - ☐ < 5 minutes
  - ☐ 5 - 15 minutes
  - ☐ 16 - 30 minutes
  - ☐ 31 - 60 minutes
  - ☐ 61 - 120 minutes
  - ☐ More than 120 minutes
  - ☐ No-one would notice.
  - ☐ I don't know.
